# Supplementary material for: Phenol Biodegradation and Bioelectricity Generation by a Native Bacterial Consortium Isolated from Petroleum Refinery Wastewater
Source: MDPI journal article supplement (doi:10.3390/su141912912), 2022-10-10
Supplement: s1 [file s1]

# Phenol Biodegradation and Bioelectricity Generation by a Native Bacterial Consortium Isolated from Petroleum Refinery Wastewater

Sara Shebl <sup>1</sup>, Nourhan N. Hussien <sup>1</sup>, Mohab H. Elsabrouty <sup>1</sup>, Sarah M. Osman <sup>1</sup>, Bassma H. Elwakil <sup>2,\*</sup>, Doaa A. Ghareeb <sup>3</sup>, Safaa M. Ali <sup>4</sup>, Nevine Bahaa El Din Ghanem <sup>1</sup>, Yehia M. Youssef <sup>5</sup>, Essam El Din A. Moussad <sup>6</sup> and Zakia A. Olama <sup>1</sup>

<sup>1</sup> Botany & Microbiology Department, Faculty of Science, Alexandria University, Alexandria 21500, Egypt

<sup>2</sup> Medical Laboratory Technology Department, Faculty of Applied Health Sciences Technology, Pharos University in Alexandria, Alexandria 21500, Egypt

<sup>3</sup> Biochemistry Department, Faculty of Science, Alexandria University, Alexandria 21500, Egypt

<sup>4</sup> Nucleic Acid Research Center, City of Scientific Research and Technology Applications, Alexandria 21934, Egypt

<sup>5</sup> Chemical and Petrochemical Department, Faculty of Engineering and Technology, Arab Academy for Science, Technology and Maritime Transport, Alexandria 1129, Egypt

<sup>6</sup> Zoology Department, Faculty of Science, Alexandria University, Alexandria 21500, Egypt

\* Correspondence: bassma.hassan@pua.edu.eg

## Supplementary data

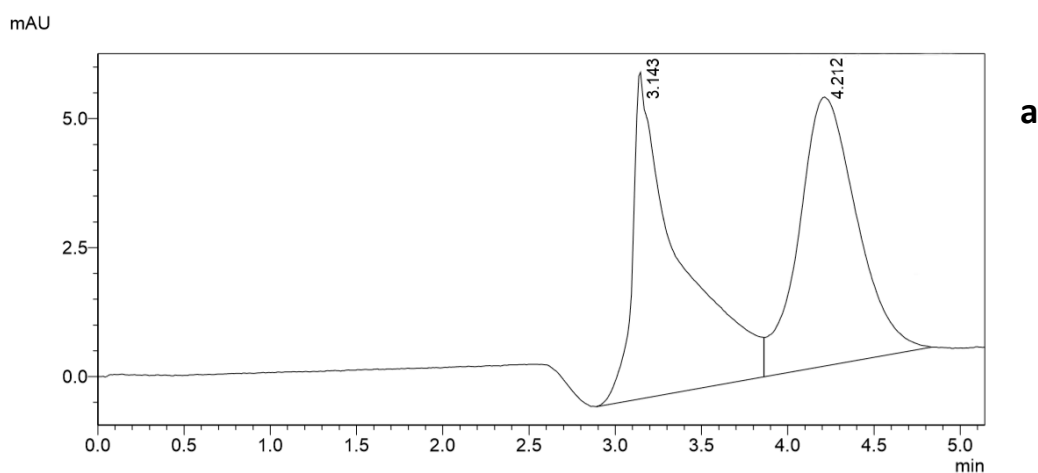

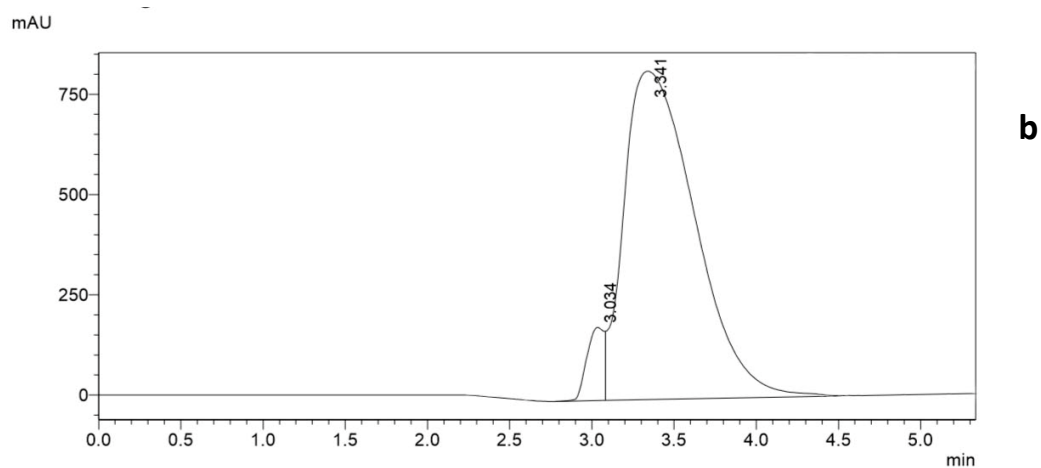

**Figure S1.** Phenol detection and estimation using HPLC; medium before fermentation (a), after fermentation with bacterial consortium B (b).
